# Supplementary material for: Restriction Enzyme Body Doubles and PCR Cloning: On the General Use of Type IIS Restriction Enzymes for Cloning
Source: PubMed Central journal article supplement (PMC3949710; doi:10.1371/journal.pone.0090896), 2014-03-11
Supplement: pone.0090896.s001.pdf [file pone.0090896.s001.pdf]

| No. | insert                          | forward primer                                 | reverse primer                               | Body double for? | acceptor vector              | annealing temperature | number of cycles |
|-----|---------------------------------|------------------------------------------------|----------------------------------------------|------------------|------------------------------|-----------------------|------------------|
| 1   | mCherry                         | agatcgctctccCATGgtgagcaaggcgaggag              | cgagacgctctccgcactgtacagctctcc               | NcoI             | pTXB3 <sup>10xHis</sup>      | 58°C → 72°C           | 5 + 30           |
| 2   | mPrP <sup>wt</sup>              | ctgatgcgtctccCATGaaaaaggccaaagcctgg            | aaaagcgtctctgcaggatcttccccgtcg               | NcoI             | pTXB3                        | 58°C → 72°C           | 5 + 30           |
| 3   | mPrP <sup>wt 3f4</sup>          | ctgatgcgtctccCATGaaaaaggccaaagcctgg            | aaaagcgtctctgcaggatcttccccgtcg               | NcoI             | pTXB3                        | 58°C → 72°C           | 5 + 30           |
| 4   | mPrP<br>(90-232)                | taaggccgtctccCATGcaaggaggaggtaccataatcagt<br>g | gagcgcgtcttcagcagctactggatcttccccgtgtaataggc | NcoI             | pTXB3 <sup>10xHis</sup>      | 64°C → 72°C           | 5 + 30           |
| 5   | mPrP<br>(90-232) <sup>3f4</sup> | taaggccgtctccCATGcaaggaggaggtaccataatcagt<br>g | gagcgcgtcttcagcagctactggatcttccccgtgtaataggc | NcoI             | pTXB3 <sup>10xHis</sup>      | 64°C → 72°C           | 5 + 30           |
| 6   | mPrP<br>(23-177) <sup>3f4</sup> | ctgatgcgtctccCATGaaaaaggccaaagcctgg            | atggtggctctccgcagctcgtgcacgaagtgtctgg        | NcoI             | pTXB3                        | 58°C → 72°C           | 5 + 30           |
| 7   | mPrP<br>(23-212) <sup>3f4</sup> | ctgatgcgtctccCATGaaaaaggccaaagcctgg            | tggtacgctctccgcacatctgtccaccacgcgtcc         | NcoI             | pTXB3                        | 58°C → 72°C           | 5 + 30           |
| 8   | mSho                            | gctatacgtctccCATGaaggcgccgcgga                 | agacaagctctctgcagtgccagccctgagcc             | NcoI             | pTXB3 <sup>10xHis</sup>      | 63°C → 72°C           | 5 + 30           |
| 9   | mSho-linker                     | gctatacgtctccCATGaaggcgccgcgga                 | ctatgcgtctctgcagccggaagccaggcccag            | NcoI             | pTXB3 <sup>10xHis</sup>      | 63°C → 72°C           | 5 + 30           |
| 10  | mPrP <sup>wt</sup>              | aaaaaccgggagacgatggcgaacctggctactg             | aaaaaTGCAggagacgctatcccacgatcaggaag          | PstI             | psiSTRIKE- <sub>hM</sub> GFP | 60°C                  | 30               |
| 11  | mPrP <sup>wt</sup> -<br>mCherry | aaggagcgtctccCATGaaaaaggccaaag                 | cggatcaagcttcaacaatggtggtgatgatg             | NcoI             | pTrcHisA                     | 55°C → 65°C           | 5 + 35           |

|    |                                  |                                       |                                       |                 |                                                               |             |        |
|----|----------------------------------|---------------------------------------|---------------------------------------|-----------------|---------------------------------------------------------------|-------------|--------|
| 12 | mPrP <sup>wt</sup> -<br>EYFP-GPI | tttcctcatgaacgttatcccctgattctgtg      | acacgtctcgGTACcttacaatttacgcgtaagatac | BsrGI           | pSB <sup>inz</sup> [30]                                       | 55°C → 65°C | 5 + 35 |
| 13 | mPrP(29-<br>135)-<br>mCherry     | ggaggatggaacaccgggtggaagtcgataccc     | ccgcgtctcaGTACccgtggtggtgatgatggtgc   | BsrGI           | pSB <sup>inz</sup> -<br>mPrP <sup>wt</sup> -<br>EYFP-GPI      | 55°C → 65°C | 5 + 35 |
| 14 | mPrP <sup>wt</sup>               | cgcgatcacatggtcctcaaggagttcgtgaccgc   | gagaaacgtctcaAGCTctaggatcttcccgtcgta  | HindIII         | pRSETb-<br>GFP <sup>6xHis cys</sup>                           | 55°C → 65°C | 5 + 35 |
| 15 | mSho <sup>RQ</sup>               | aaaaaacgtctcgGGCCaaggaggagctcaaggc    | gggggggatccgtattgtggtgctggttg         | NotI            | pSS-mSho-<br>EYFP-GPI<br>[33]                                 | 57°C        | 40     |
|    |                                  | aaaaaacgtctcgGATCctctctgcgcgtggcggctg | ccccgaccgtaaggaagtccaggcccag          | BamHI           |                                                               | 67°C → 70°C | 5 + 35 |
| 16 | mSho <sup>RQ</sup>               | aaaaaacgtctcgGGCCaaggaggagctcaaggc    | cccgaaggatcctaaggccaagcagttctag       | NotI            | pSS-<br>EYFP <sup>ML</sup> -<br>mSho-GPI<br>[33]              | 61°C → 70°C | 5 + 35 |
| 17 | mSho <sup>RQ</sup>               | aaaaaacgtctcgGGCCaaggaggagctcaaggc    | cccgaaggatcctaaggccaagcagttctag       | NotI            | pEYFP-<br>mSho-GPI<br>[33]                                    | 66°C → 70°C | 5 + 35 |
| 18 | mSho-GPI                         | atatacgtctcaCCGgccgaattctaaggg        | atatacgtctcaCTAGaggatcctaaggc         | NgoMIV,<br>XbaI | pACS-<br>KDEL-<br>SS <sup>IL2</sup> -SBP-<br>EYFP-GPI<br>[31] | 49°C → 70°C | 5 + 35 |
| 19 | NLS <sup>x3SV40</sup>            | ggggggCCGGagagacggcagatccaaaaaagaag   | gggggggCCGGgagacgttatctacctttctcttt   | AgeI            | pSS-mSho-<br>EYFP-GPI<br>[33]                                 | 48°C        | 40     |
| 20 | NLS <sup>x3SV40</sup>            | ggggggaccggtcgcagatccaaaaaagaag       | gggggggCCGGgagacgttatctacctttctcttt   | AgeI            | pSS-<br>EYFP <sup>ML</sup> -GPI<br>[33]                       | 48°C        | 40     |

|           |                     |                                  |                              |                  |                                                                 |             |        |
|-----------|---------------------|----------------------------------|------------------------------|------------------|-----------------------------------------------------------------|-------------|--------|
| <b>21</b> | SBP-mSho<br>(25-32) | agctacgtctcaGTACgcgacgagaagaccac | atcagatatacgtctccTCGAgcgcctc | Pfl23II,<br>XhoI | pACS-<br>KDEL-<br>SS <sup>IL2</sup> -SBP-<br>E-GFP-mSho-<br>GPI | 50°C → 67°C | 5 + 35 |
|-----------|---------------------|----------------------------------|------------------------------|------------------|-----------------------------------------------------------------|-------------|--------|
